# Supplementary material for: Defects in Antiviral T Cell Responses Inflicted by Aging-Associated miR-181a Deficiency
Source: PubMed Central journal article supplement — Cell Rep. Author manuscript; Available in PMC 2020 Jan 13. (PMC6957231; doi:10.1016/j.celrep.2019.10.044), 2019-11-19
Supplement: NIHMS1544236-supplement-1.pdf [file NIHMS1544236-supplement-1.pdf]

**Cell Reports, Volume 29**

## **Supplemental Information**

### **Defects in Antiviral T Cell Responses**

#### **Inflicted by Aging-Associated miR-181a Deficiency**

**Chulwoo Kim, Rohit R. Jadhav, Claire E. Gustafson, Megan J. Smithey, Alec J. Hirsch, Jennifer L. Uhrlaub, William H. Hildebrand, Janko Nikolich-Zugich, Cornelia M. Weyand, and Jörg J. Goronzy**

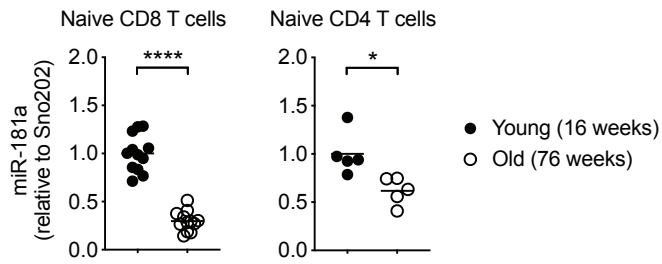

**Figure S1. Mouse T cells have reduced miR-181a expression with age.** Related to Figure 1.

CD62L<sup>+</sup> CD44<sup>-</sup> naïve CD8 and CD4 T cells were sorted from spleens of young (16 weeks) and old (76 weeks) wild-type mice; miR-181a expression was measured by quantitative RT-PCR. Results were normalized to the expression of Sno202 and are presented relative to those of cells from young mice. Data are pooled with 5-12 mice per group. Each symbol represents an individual mouse and horizontal lines indicate the mean. \* $p < 0.05$ , \*\*\*\* $p < 0.0001$  by two-tailed unpaired Student's t test.

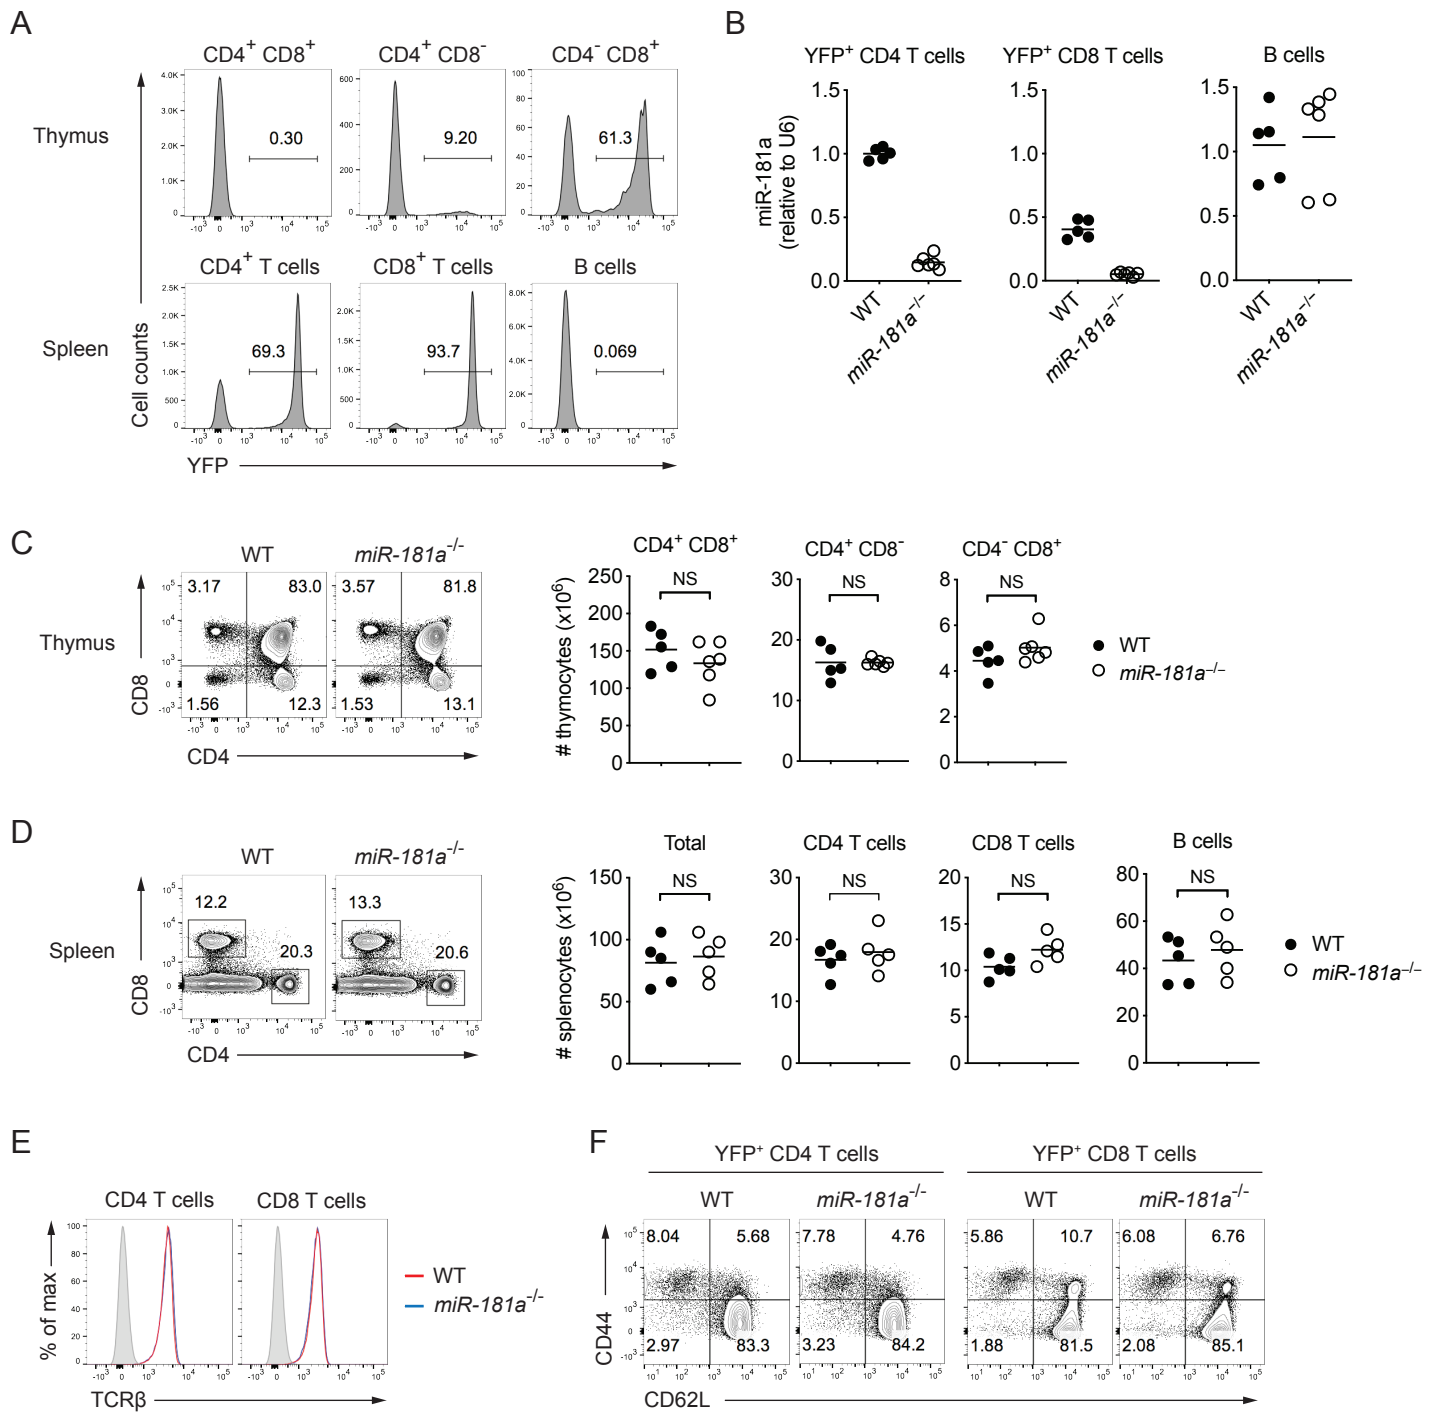

**Figure S2. Generation of mice with mature T cells deficient for miR-181ab1.** Related to Figure 1.

(A) *dLck-Cre* mice were crossed to *ROSA26<sup>YFP</sup>* mice. Indicated cell populations in the thymus and spleen were analyzed for YFP expression, a surrogate marker for Cre-mediated gene deletion. (B-F) *dLck-Cre<sup>+</sup> ROSA26<sup>YFP</sup>* mice were crossed to *miR-181ab1<sup>fl/fl</sup>* mice to generate *dLck-Cre<sup>+</sup> ROSA26<sup>YFP</sup> miR-181ab1<sup>fl/fl</sup>* mice (referred to as *miR-181a<sup>-/-</sup>* mice) and *dLck-Cre<sup>+</sup> ROSA26<sup>YFP</sup> miR-181ab1<sup>+/+</sup>* mice (referred to as WT mice). (B) YFP<sup>+</sup> CD4 T cells, YFP<sup>+</sup> CD8 T cells and B220<sup>+</sup> B cells in the spleens of WT and *miR-181a<sup>-/-</sup>* mice were sorted, and miR-181a expression was measured by quantitative RT-PCR. Results were normalized to the expression of U6 and are presented relative to those of YFP<sup>+</sup> CD4 T cells from WT mice. (C) Representative flow plots of thymic T cell subsets (left) and summary data (right). (D) Representative flow plots of splenic CD4 and CD8 T cells (left) and summary data (right). (E) Representative flow plots of TCR β-chain expression and (F) CD44/CD62L expression by YFP<sup>+</sup> CD4 and CD8 T cells in the spleen. Filled gray in (E) indicates non-T cells. Data are pooled from two independent experiments with 5-6 mice per group. Each symbol represents an individual mouse and horizontal lines indicate the mean. NS, not significant; all by two-tailed unpaired Student's t test.

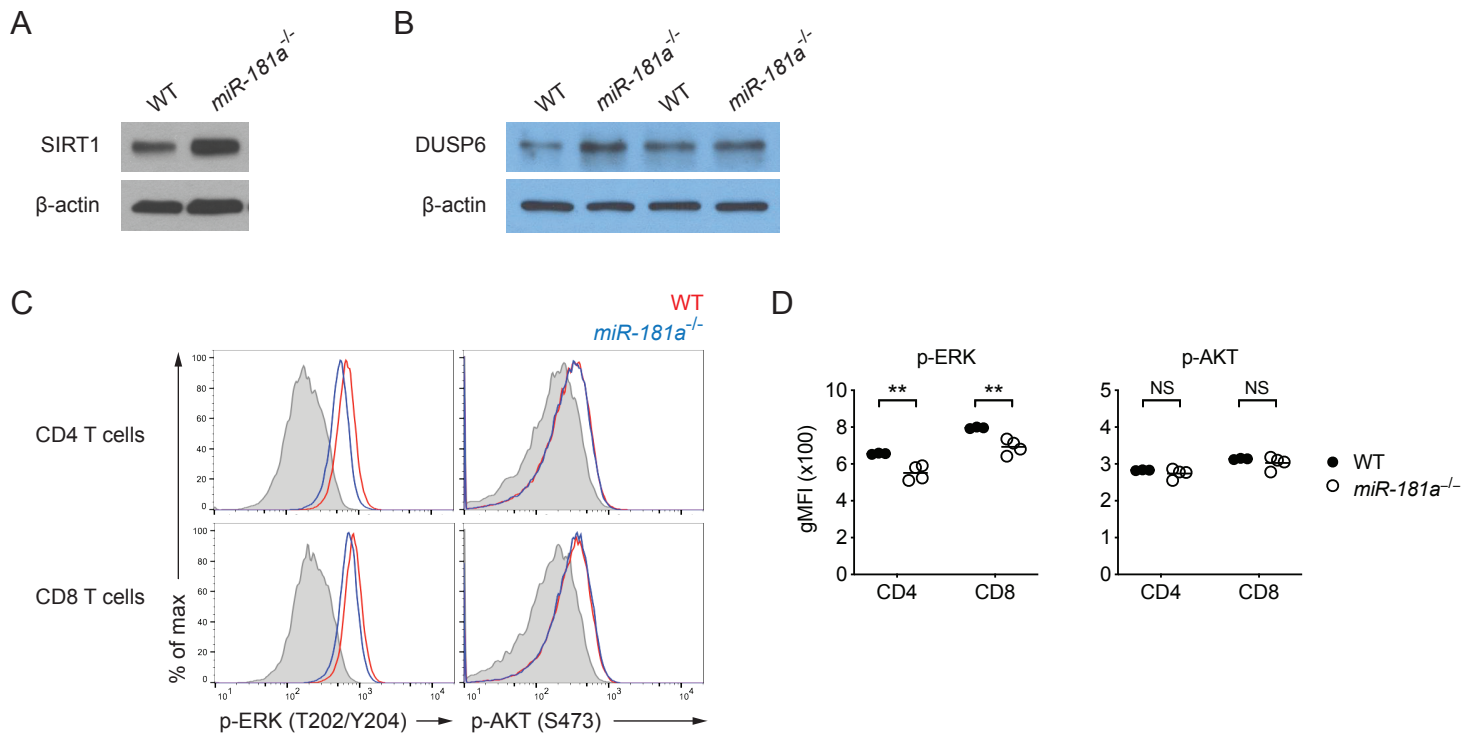

**Figure S3. Expression of miR-181a target genes in miR-181a-deficient T cells.** Related to Figure 1.

(A-B) YFP<sup>+</sup> splenic CD4 T cells of naïve WT and *miR-181a*<sup>-/-</sup> mice were sorted. SIRT1 (A) and DUSP6 (B) expression were assessed by Western blot. (C-D) Total T cells isolated from the spleens of WT and *miR-181a*<sup>-/-</sup> mice were cross-linked with anti-CD3 antibody for 10 minutes. Representative histograms (C) and geometric MFI (D) of phosphorylated ERK and AKT in YFP<sup>+</sup> CD4 and CD8 T cells are shown. Filled gray indicates unstimulated T cells. Data are representative of two independent experiments (A-B) or pooled from two independent experiments with 3-4 mice per group (C-D). Each symbol represents an individual mouse and horizontal lines indicate the mean in (D). \*\*p < 0.01; NS, not significant; all by two-tailed unpaired Student's t test.



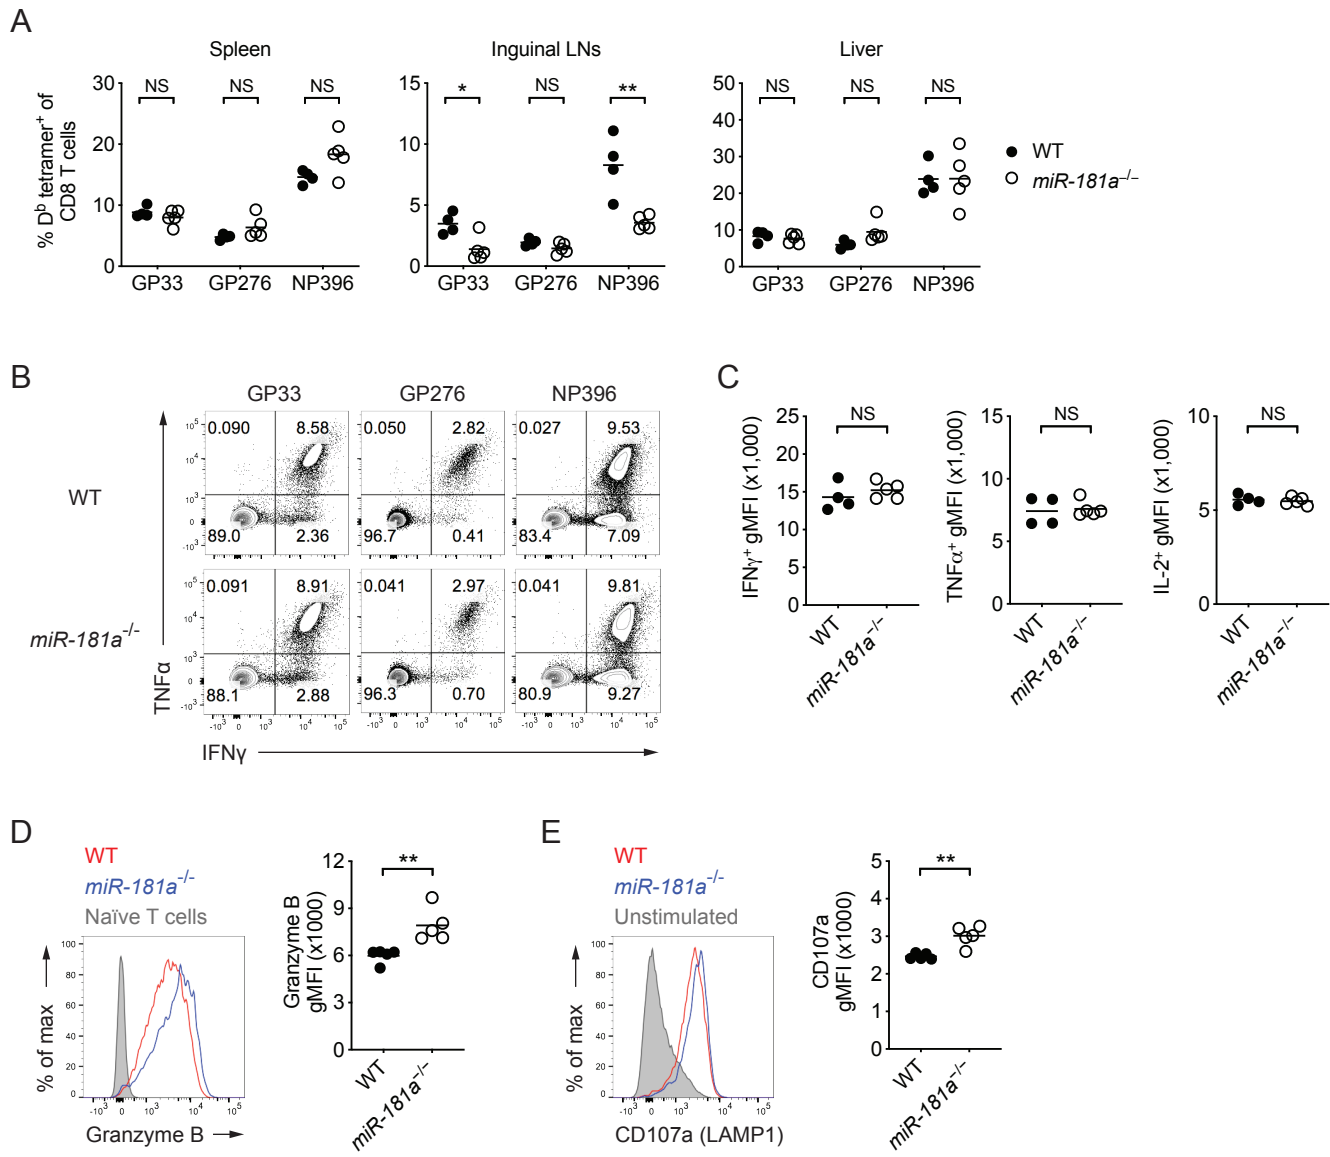

**Figure S4. Functional assessment of miR-181a-deficient effector CD8 T cells.** Related to Figure 1.

WT and *miR-181a*<sup>-/-</sup> mice were acutely infected with LCMV and analyzed on day 8. **(A)** Plots show the percent frequencies of D<sup>b</sup> tetramer<sup>+</sup> cells for indicated epitopes among YFP<sup>+</sup> CD8 T cells in the spleen, inguinal lymph nodes and liver. **(B-E)** Splenocytes were restimulated with the indicated peptides. **(B)** Representative flow plots of IFN $\gamma$  and TNF $\alpha$  production by YFP<sup>+</sup> CD8 T cells, **(C)** geometric MFI of IFN $\gamma$ , TNF $\alpha$  and IL-2, **(D)** representative histogram of granzyme B production and summary graph of geometric MFI and **(E)** histogram of surface CD107a (LAMP1) and summary graph of GP33-specific CD8 T cells are shown. Data are representative of two independent experiments with 4-5 mice per group. Each symbol represents an individual mouse and horizontal lines indicate the mean. \* $p < 0.05$ , \*\* $p < 0.01$ ; NS, not significant; all by two-tailed unpaired Student's t test.

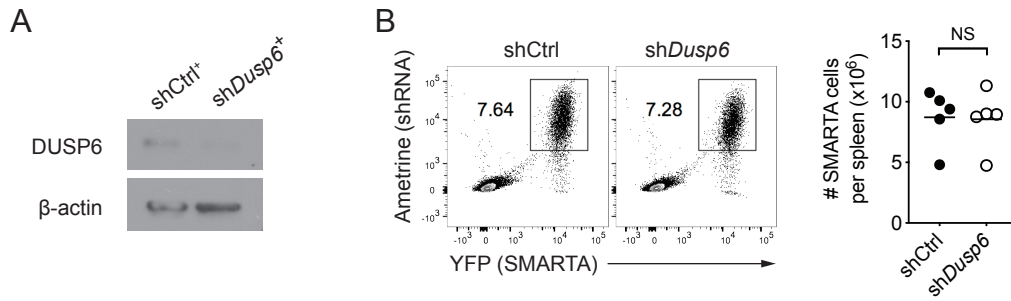

**Figure S5. Dusp6 silencing of miR-181a-deficient SMARTA CD4 T cells does not rescue the defect in cell expansion.**

Related to Figure 2.

(A) miR-181a-deficient SMARTA CD4 T cells were retrovirally transduced with either shCtrl or shDusp6. DUSP6 and β-actin expression were assessed on sorted shCtrl<sup>+</sup> and shDusp6<sup>+</sup> cells (Ametrine<sup>+</sup> YFP<sup>+</sup> CD4<sup>+</sup>) by Western blot. (B) shCtrl<sup>+</sup> and shDusp6<sup>+</sup> miR-181a-deficient SMARTA cells were sorted and adoptively transferred into B6 hosts, followed by LCMV infection four days later. Representative flow plots of shRNA<sup>+</sup> SMARTA cell frequency among total CD4 T cells on day 8 (left) and summary graph of the total number of shRNA<sup>+</sup> SMARTA cells in the spleen are shown. Data are from one experiment with 5 mice per group. Each symbol represents an individual mouse and horizontal lines indicate the mean. NS, not significant by two-tailed unpaired Student's t test.

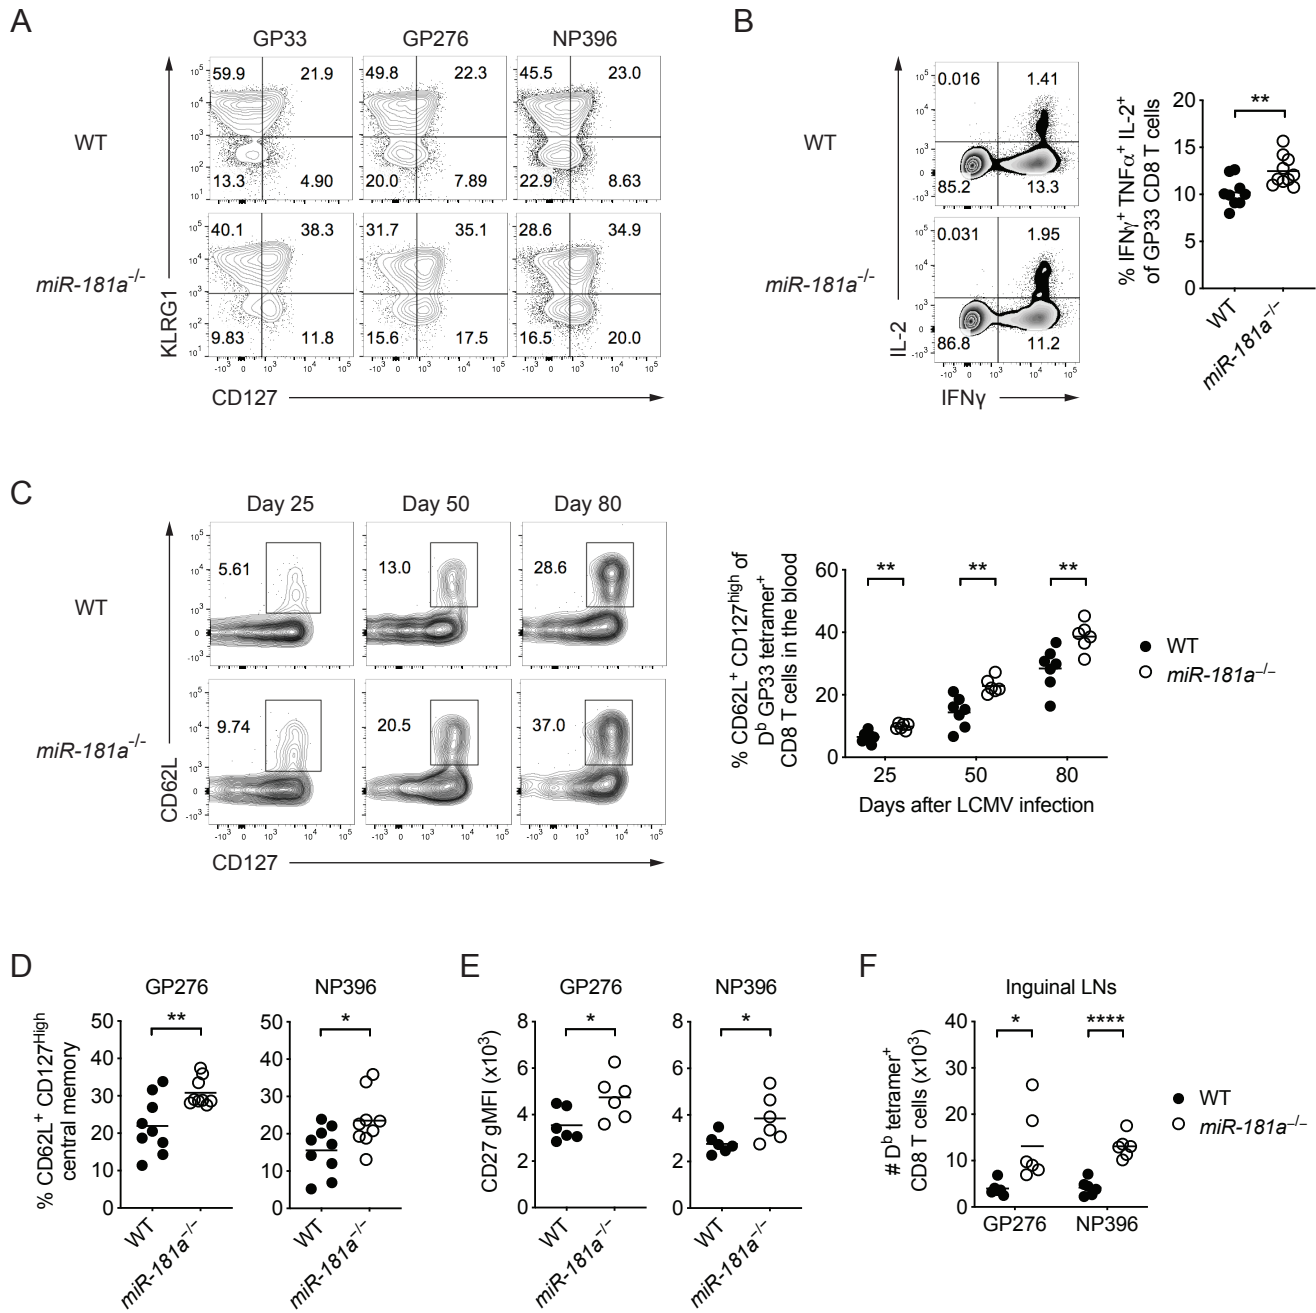

**Figure S6. miR-181a is required for the generation of effector memory CD8 T cells.** Related to Figure 4.

WT and *miR-181a*<sup>-/-</sup> mice were infected with LCMV. (A) Representative flow plots of KLRG1 and CD127 expression by D<sup>b</sup> tetramer<sup>+</sup> YFP<sup>+</sup> CD8 T cells for indicated epitopes are shown on day 8. (B) Representative flow plots of IFN $\gamma$  and IL-2 production (left) and summary data of the proportion of cells co-producing IFN $\gamma$ , TNF $\alpha$  and IL-2 (right) by D<sup>b</sup> GP33 tetramer<sup>+</sup> YFP<sup>+</sup> CD8 T cells on day 8. (C) Representative flow plots of CD62L and CD127 expression (left) and summary data of CD62L<sup>+</sup> CD127<sup>high</sup> central memory cell frequencies (right) among D<sup>b</sup> GP33 tetramer<sup>+</sup> YFP<sup>+</sup> CD8 T cells in the blood at indicated time points after LCMV infection. (D-F) WT and *miR-181a*<sup>-/-</sup> mice were infected with LCMV, and memory CD8 T cells were analyzed on day 90. Plots show the relative frequency of CD62L<sup>+</sup> CD127<sup>high</sup> central memory cells (D) and geometric MFI of CD27 expression (E) of D<sup>b</sup> tetramer<sup>+</sup> memory CD8 T cells for indicated epitopes in the spleen. (F) Plots show the numbers of D<sup>b</sup> tetramer<sup>+</sup> memory CD8 T cells for indicated epitopes in lymph nodes. Data are representative of three independent experiments with 4-5 mice per group (A) or pooled from 2-3 independent experiments with 6-10 mice per group (B-F). Each symbol represents an individual mouse and horizontal lines indicate the mean. \**p* < 0.05, \*\**p* < 0.01, \*\*\*\**p* < 0.0001; all by two-tailed unpaired Student's *t* test.

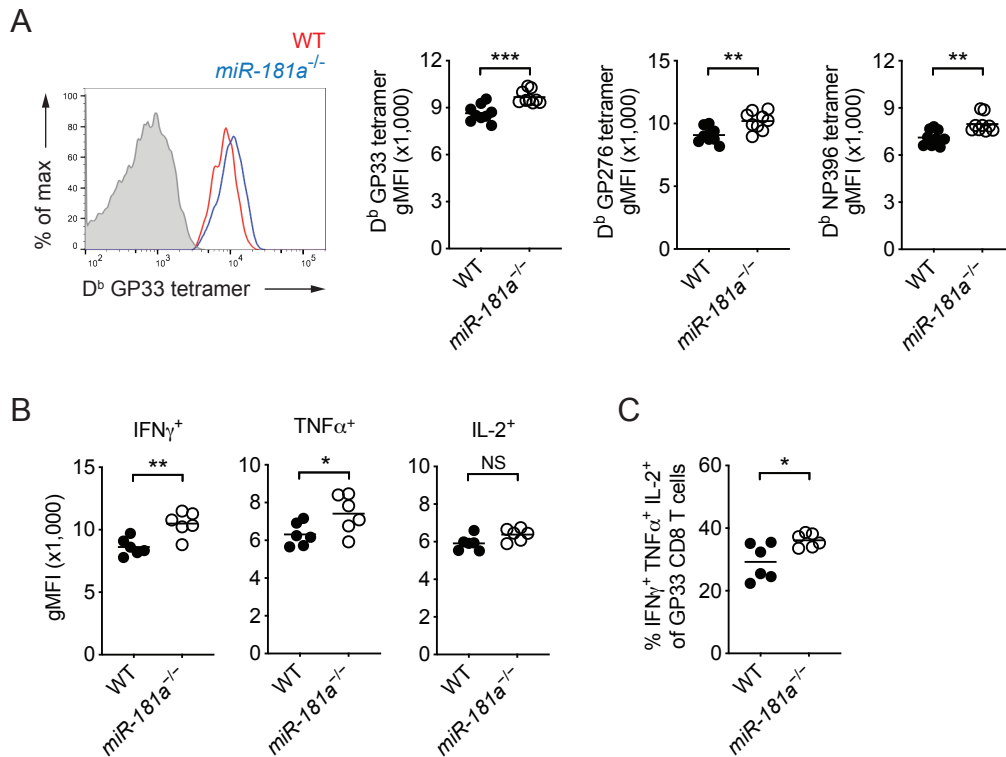

**Figure S7. Characterization of miR-181-deficient memory CD8 T cells.** Related to Figure 4.

WT and *miR-181a*<sup>-/-</sup> mice were infected with LCMV, and their spleens were harvested on day 85. (A) Representative histogram of tetramer binding intensity of D<sup>b</sup> GP33 tetramer<sup>+</sup> YFP<sup>+</sup> CD8 T cells (left) and dot plots of geometric tetramer MFI for indicated epitopes (right) are shown. Filled gray in histogram indicates naïve CD8 T cells. Dot plots show geometric MFI of indicated cytokines (B) and the proportion of cells co-producing IFN $\gamma$ , TNF $\alpha$  and IL-2 (C) by GP33-specific YFP<sup>+</sup> CD8 T cells. Data are pooled from two independent experiments with 6 mice per group. Each symbol represents an individual mouse, and horizontal lines indicate the mean. Statistical significance was determined by two-tailed unpaired Student's t test. \*P < 0.05; \*\*P < 0.01; \*\*\*P < 0.001; NS, not significant.
